# Supplementary material
Source: PubMed Central journal article supplement (PMC3935581)
Supplement: ASN.2013030320_ASN2013030320SupplementaryData.pdf [file ASN.2013030320_ASN2013030320SupplementaryData.pdf]

**Autoantibodies to LAMP-2 in ANCA negative pauci-immune focal necrotizing  
glomerulonephritis**

**Supplementary material**

## Supplementary figure 1

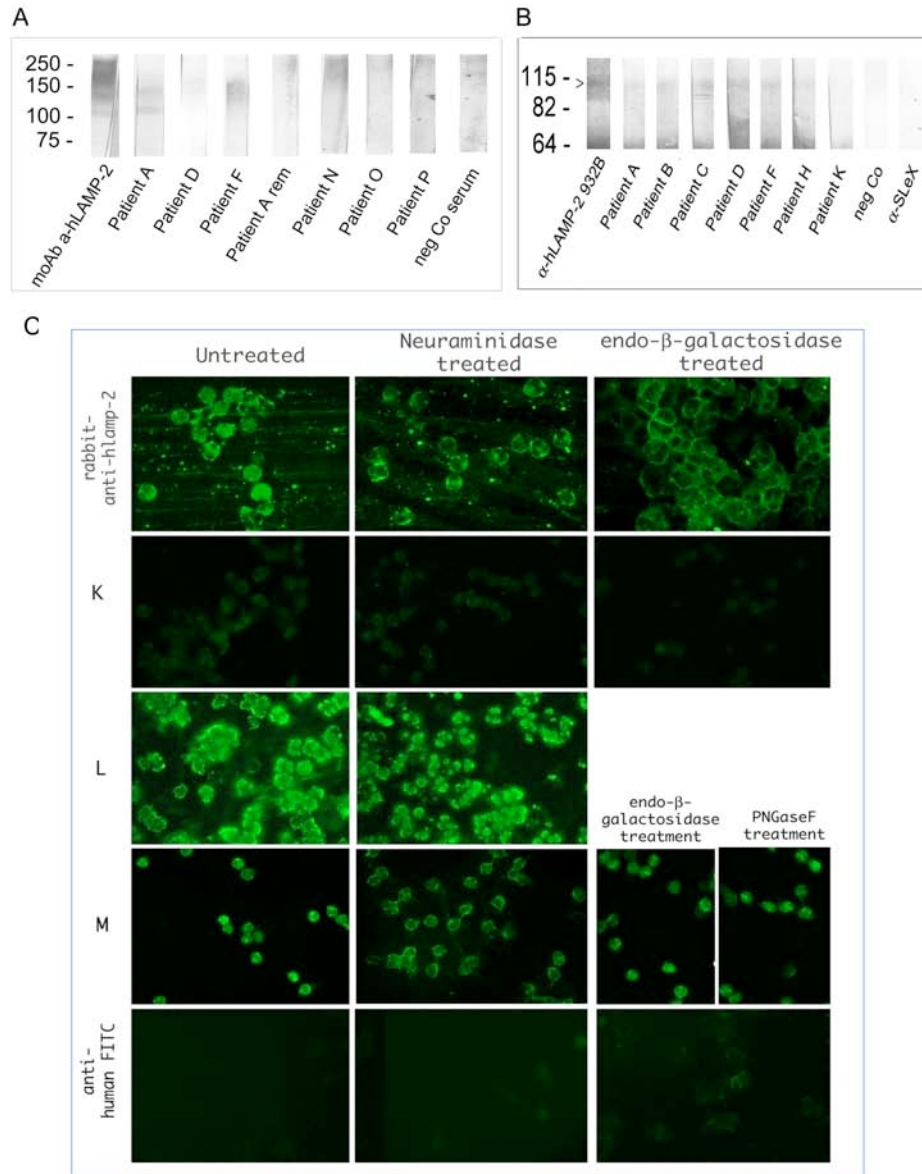

**Supplementary figure 1. Patients' autoantibodies binding to native human glomerular and neutrophil LAMP-2.** Sera with antibodies to hLAMP-2 (patients A, D, and F) but not sera from patients in remission (patient A rem) or without antibodies to hLAMP-2 (patients N, O, and P) bound by immunoblot to a band recognized by a polyclonal antibody to hLAMP-2 (932B). This corresponds to native hLAMP-2 immunopurified from isolated human glomeruli (A).

Next we tested whether removal of glycans from neutrophil hLAMP-2 could restore binding of patients' IgG. hLAMP-2 from PMN lysates was immunopurified using monoclonal and polyclonal antibodies to hLAMP-2, treated for 1 hour with Neuraminidase (diluted in 50mM acetate pH 5.5, 154mM NaCl and 9mM CaCl<sub>2</sub>), subjected to SDS-PAGE and subsequent transfer onto nitrocellulose.

Removal of sialic acid residues was confirmed with an antibody to Sialyl LewisX and yielded a dominant band of approx. 110 kDal identified by a polyclonal antibody to hLAMP-2 (932B) that was also recognized by sera that exhibited reactivity with glomerular hLAMP-2 (patients A, B, C, D, F, and H) but not hLAMP-2 negative (patient K) patients or controls (B).

PMN preparations were used either untreated, treated with Neuraminidase, PNGaseF or endo- $\beta$ -galactosidase to test whether removal glycans influenced the ANCA pattern obtained with either anti-PR3 or anti-MPO ANCA. Patients' sera were used as primary antibodies and binding was visualised using FITC conjugated anti-human IgG. As demonstrated for two of these sera, one with pANCA/anti-MPO (patient L) and one with cANCA/anti-PR3 (patient M) antibodies, reactivity with normal human granulocytes does not change after removal of either sialic acid residues with neuraminidase (patients L and M) or poly-lactosamines and *N*-glycans with endo- $\beta$ -galactosidase and PNGaseF, respectively (patient M). Similarly, staining pattern of a polyclonal rabbit-anti-hLAMP-2 serum or human serum that does not contain antibodies to either ANCA or hLAMP-2 (patient K) does not change after treatment of PMN with de-glycosylating enzymes (C).

## Supplementary figure 2

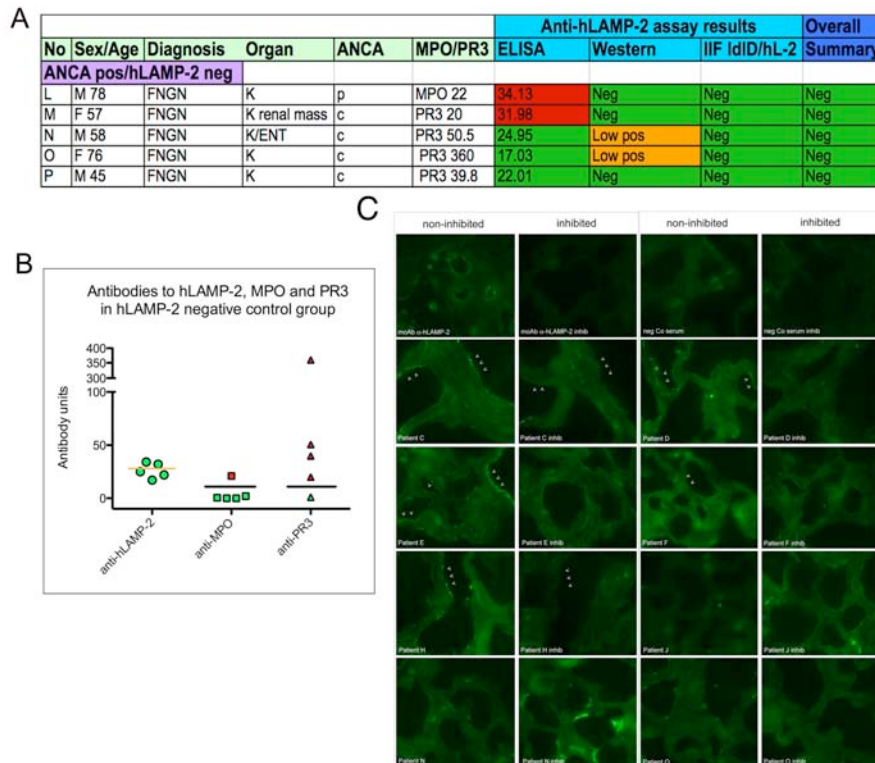

**Supplementary Figure 2. Characteristics of ANCA positive/hLAMP-2 negative patients (A) and influence of glycan removal on sera from ANCA negative and ANCA positive control groups.** Five sera from patients presenting with active piFNGN and ANCA specificity for either MPO (n = 1) or PR3 (n = 4) were chosen as control group (A). They had either limited renal disease (**patient K**) - one with a granulomatous renal mass (renal mass) - or systemic vasculitis with involvement of the upper respiratory tract (ENT). They did not have autoantibodies to hLAMP-2 that could confound the results obtained in experiments removing carbohydrate moieties from neutrophilic granulocyte proteins (A, B).

Binding to glomerular endothelial cells was assessed by incubating 1:40 dilutions of sera with 4 micron unfixed frozen sections of normal human kidney that had been depleted of non-specifically bound IgG by pre-incubation with high salt (1.8% NaCl) citrate buffer. Sera from ANCA-negative/hLAMP-2 positive (patients C, D, E, F, H) bound specifically to glomeruli with a predominantly endothelial pattern (B; non-inhibited). The slightly granular linear pattern seen after incubation with sera was identical to the endothelial staining obtained with the monoclonal antibody to hLAMP-2 (H4B4). In both cases binding was abrogated by pre-incubating the sera or monoclonal antibody with 8.5 ng/ $\mu$ l immunopurified native glomerular hLAMP-2 (B, inhibited). By contrast, sera from ANCA negative/hLAMP-2 negative (patient J), ANCA positive/hLAMP-2 negative (patients N, O) patients and serum from a healthy control did not bind to normal glomeruli.
